# Supplementary material for: Development of a caffeic acid–phthalimide hybrid compound for NADPH oxidase inhibition
Source: Royal Society of Chemistry journal article supplement (doi:10.1039/d1ra01066b), 2021-01-01
Supplement: d1ra01066b1.pdf [file d1ra01066b1.pdf]

### Electronic Supplementary Information

#### Development of a caffeic acid-phthalimide hybrid compound for NADPH oxidase inhibition

Willian Henrique dos Santos<sup>1</sup>, Maurício Yoguim<sup>1</sup>, Regina Gomes Daré<sup>2</sup>, Luiz Carlos da Silva-Filho<sup>1</sup>, Sueli Oliveira Silva Lautenschlager<sup>2</sup> and Valdecir Farias Ximenes<sup>1,\*</sup>

<sup>1</sup>Department of Chemistry, Faculty of Sciences, UNESP - São Paulo State University, 17033-360, Bauru, São Paulo, Brazil. <sup>2</sup>Department of Pharmaceutical Sciences, Maringá State University (UEM), Maringá, Paraná, Brazil.

\*Correspondence should be addressed to Valdecir Farias Ximenes.

Tel.: +55 14 3301-6088

<http://orcid.org/0000-0003-2636-3080>

Email: [valdecir.ximenes@unesp.br](mailto:valdecir.ximenes@unesp.br)

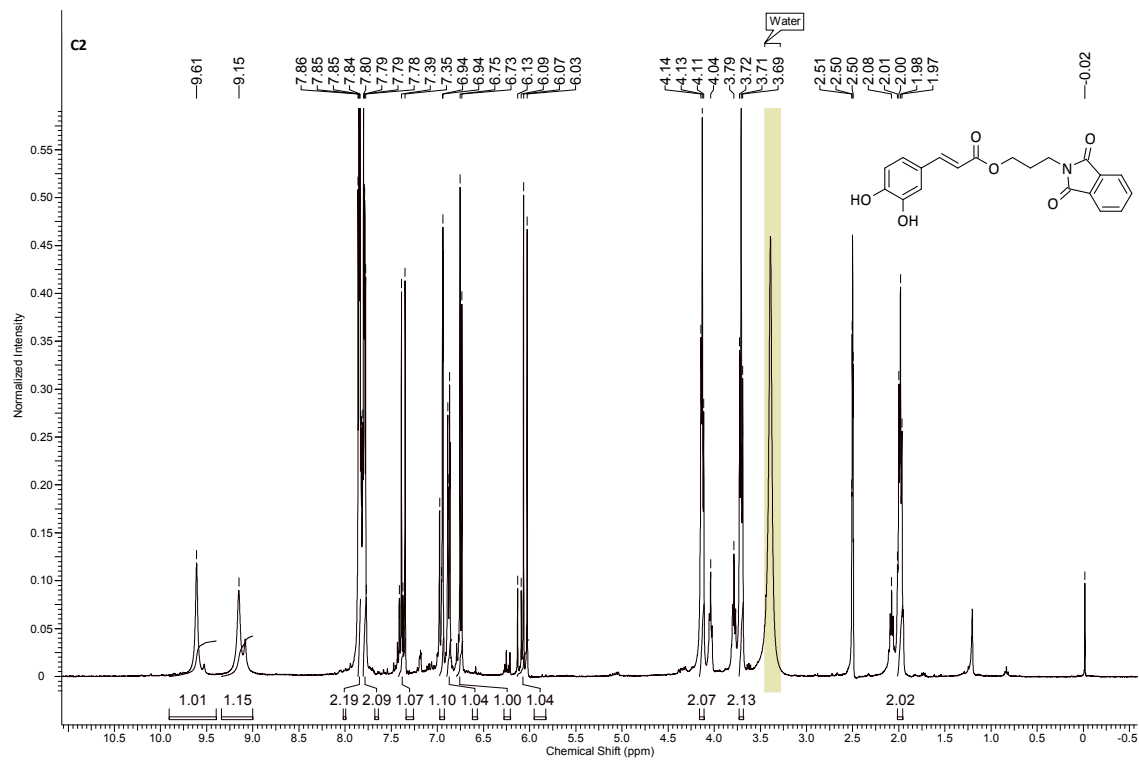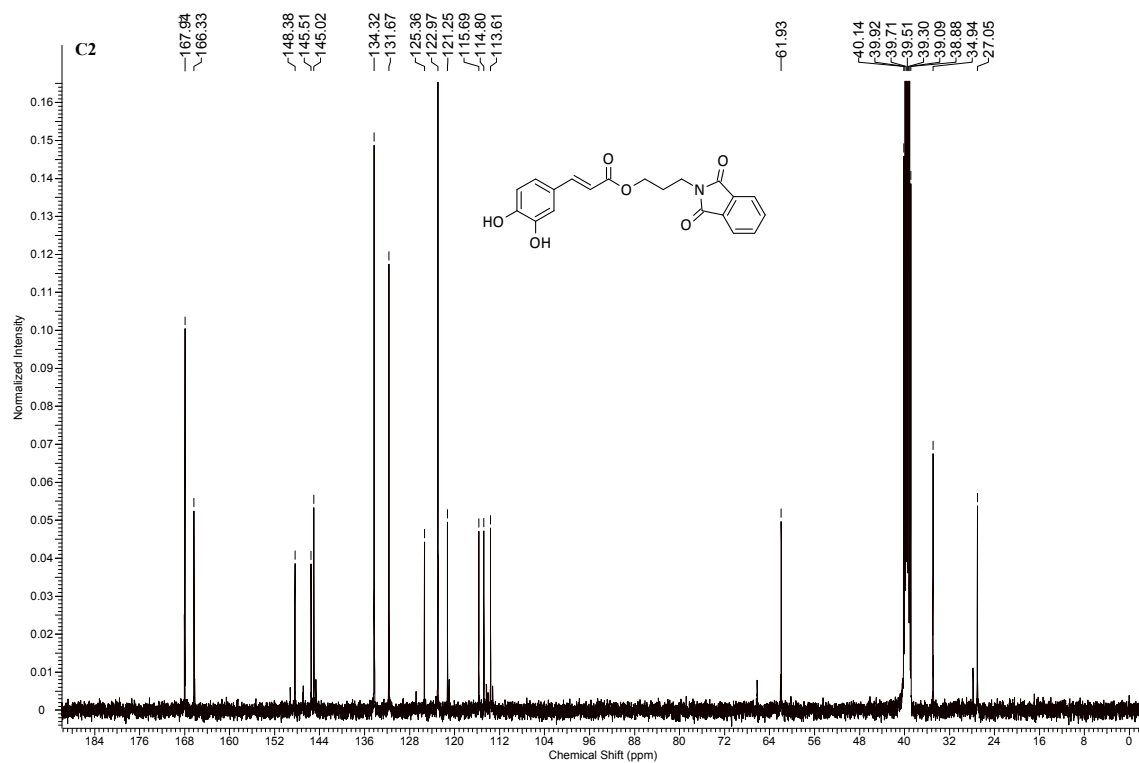

Fig S1. RMN  $^1\text{H}$  and  $^{13}\text{C}$  spectra for compound C2 in  $\text{DMSO-d}_6$ .

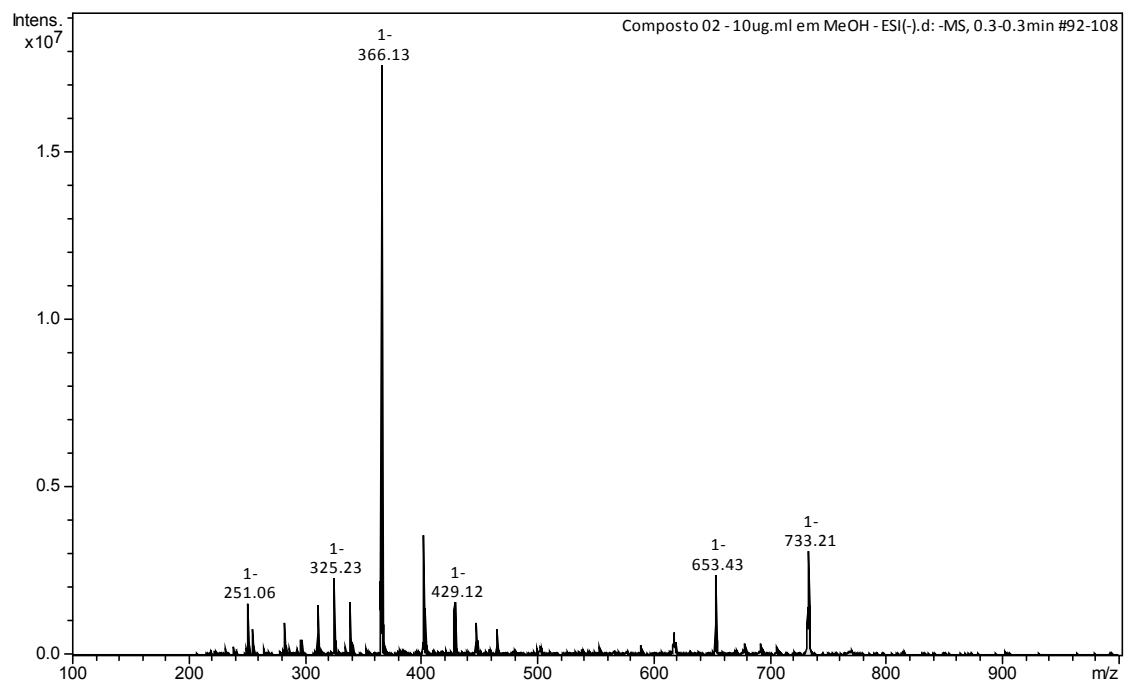

Fig S2. MS spectrum for compound C2.

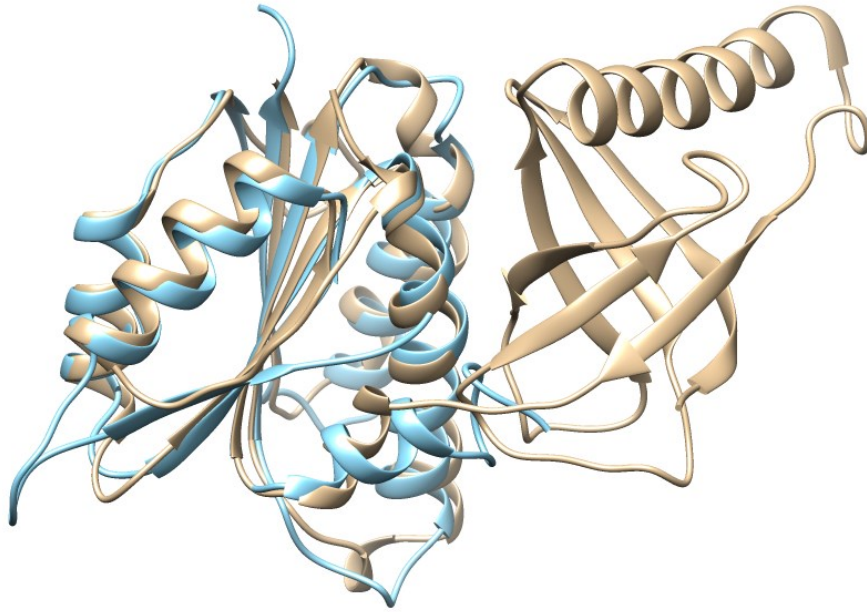

Fig S3. Structural superposition of NOX2 (PDB 3A1F – blue) and NOX5 (PDB 5O0X – brown). The study was performed using the UCSF Chimera software (RMSD 1.518). The FAD-binding domain is absent in NOX2.
